# Supplementary material for: Ionic-liquid-assisted one-pot synthesis of Cu2O nanoparticles/multi-walled carbon nanotube nanocomposite for high-performance asymmetric supercapacitors
Source: Royal Society of Chemistry journal article supplement (doi:10.1039/c8ra02951b), 2018-01-01
Supplement: c8ra02951b1.pdf [file c8ra02951b1.pdf]

## Supporting Information

# **Ionic-Liquid-Assisted One-Pot Synthesis of Cu<sub>2</sub>O Nanoparticles/Multi-Walled Carbon Nanotubes Nanocomposite for High-Performance Asymmetric Supercapacitors**

*Ying Lu, Jian-Long Xu\*, Shan Ren, Ya-Nan Zhong, Xu Gao, and Sui-Dong Wang\**

Institute of Functional Nano & Soft Materials (FUNSOM), Jiangsu Key Laboratory for Carbon-Based Functional Materials & Devices, Soochow University, Suzhou, Jiangsu 215123, P R China

Address all correspondence to the author. \*Email: [xujianlong@suda.edu.cn](mailto:xujianlong@suda.edu.cn); [wangsd@suda.edu.cn](mailto:wangsd@suda.edu.cn)

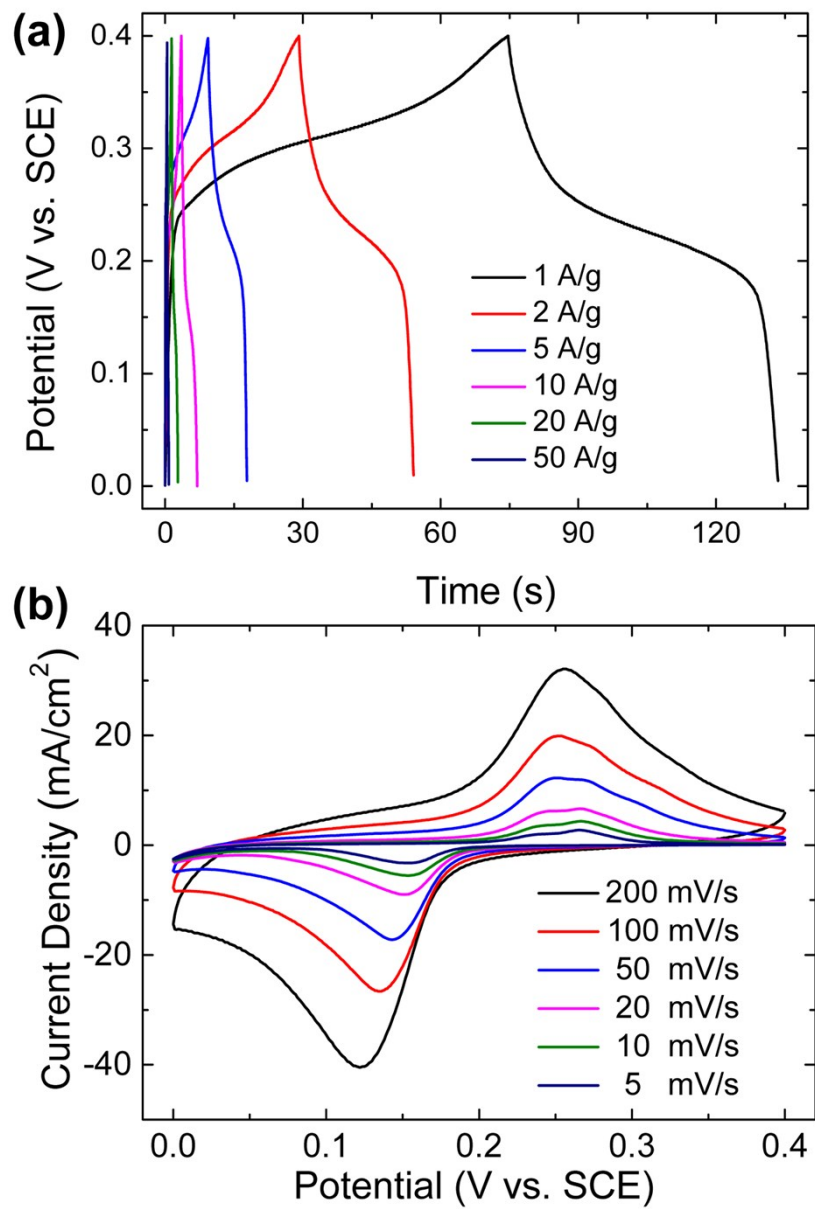

Fig. S1 Electrochemical performances of pristine carbon nanotubes in 6 M KOH aqueous solution: (a) GCD curves at various current densities ranging from 1 to 50 A/g. (b) CV curves at the scan rate ranging from 5 to 200 mV/s.

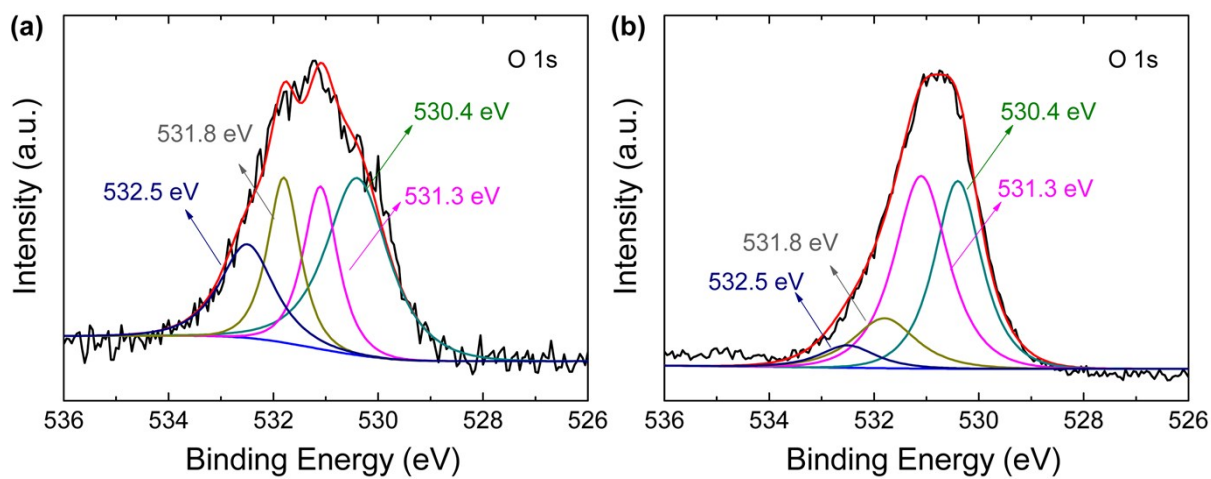

Fig. S2 XPS O 1s spectra of (a) Cu<sub>2</sub>O/MWCNTs and (b) r-Cu<sub>2</sub>O/MWCNTs nanocomposite

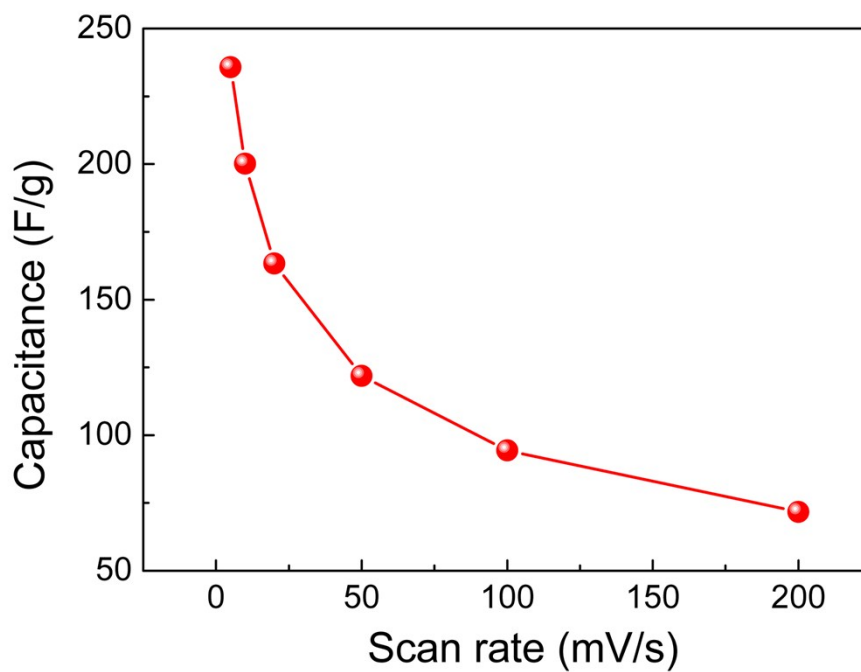

Fig. S3 Capacitance value of the ASC device as a function of the scan rate

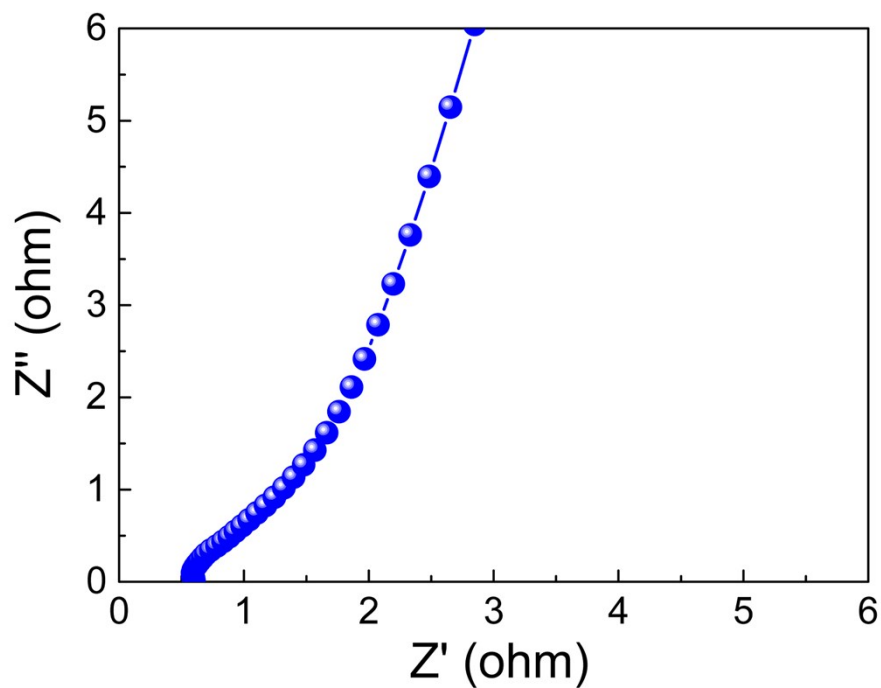

Fig. S4 Magnified part for the low real impedance part of the Nyquist plot.

**Table S1.** O1s XPS Peak Deconvolution Results

| Sample                   | O <sup>2-</sup> (%) | O <sub>2</sub> <sup>2-</sup> /O <sup>-</sup> (%) | -OH or O <sub>2</sub> (%) | H <sub>2</sub> O (%) |
|--------------------------|---------------------|--------------------------------------------------|---------------------------|----------------------|
| Cu <sub>2</sub> O/MWCNTs | 41                  | 20.7                                             | 19.7                      | 18.6                 |
| r-                       | 37.5                | 43.9                                             | 13.3                      | 5.3                  |
| Cu <sub>2</sub> O/MWCNTs |                     |                                                  |                           |                      |
